# Supplementary material for: Tuning the reactivity of molybdenum (oxy)carbide catalysts by the carburization degree: CO2 reduction and anisole hydrodeoxygenation
Source: Royal Society of Chemistry journal article supplement (doi:10.1039/d0cy00484g), 2020-01-01
Supplement: d0cy00484g1.pdf [file d0cy00484g1.pdf]

## Supporting Information

Tuning the reactivity of molybdenum (oxy)carbide catalysts by the carburization degree: CO<sub>2</sub> reduction and anisole hydrodeoxygenation

*Jiadong Zhu, Evgeny A. Uslamin, Nikolay Kosinov\* and Emiel. J. M. Hensen\**

Laboratory of Inorganic Materials and Catalysis, Department of Chemical Engineering and Chemistry, Eindhoven University of Technology, P.O. Box 513, 5600 MB Eindhoven, The Netherlands.

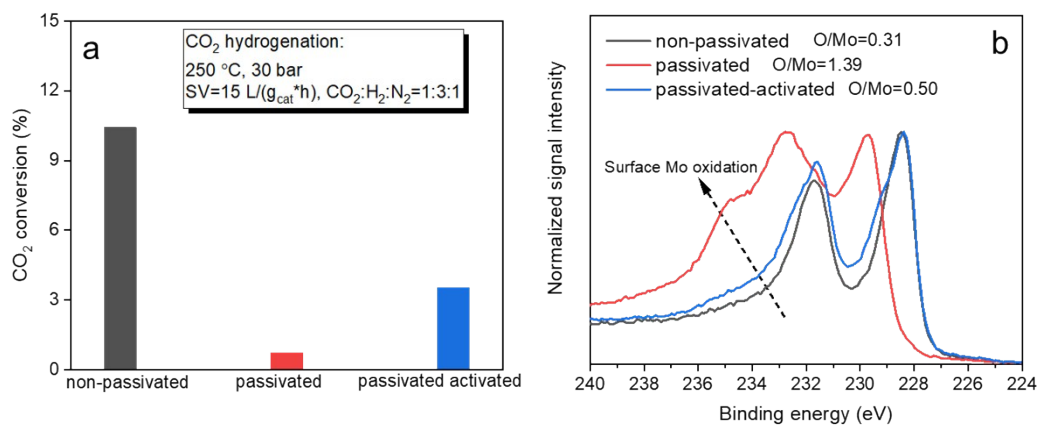

Figure S1. (A) CO<sub>2</sub> conversion over non-passivated, passivated and passivated-activated Mo/C(800) catalysts. (B) Quasi in situ Mo 3d XPS spectra of the catalysts after reaction.

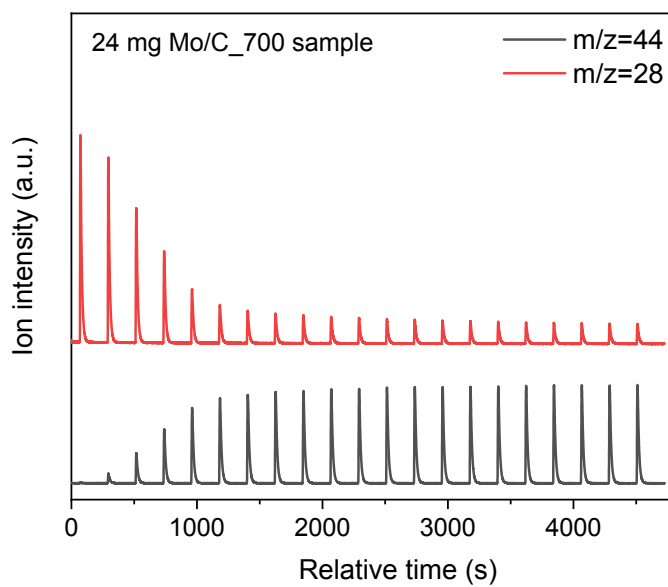

Figure S2. N<sub>2</sub>O pulse titration profiles showing N<sub>2</sub>O (m/z=44) consumption and N<sub>2</sub> (m/z=28) production over Mo/C(700) catalyst. Conditions: 50 °C, 1 mL 2% N<sub>2</sub>O pulse every 4 minutes into 50 mL/min He flow.

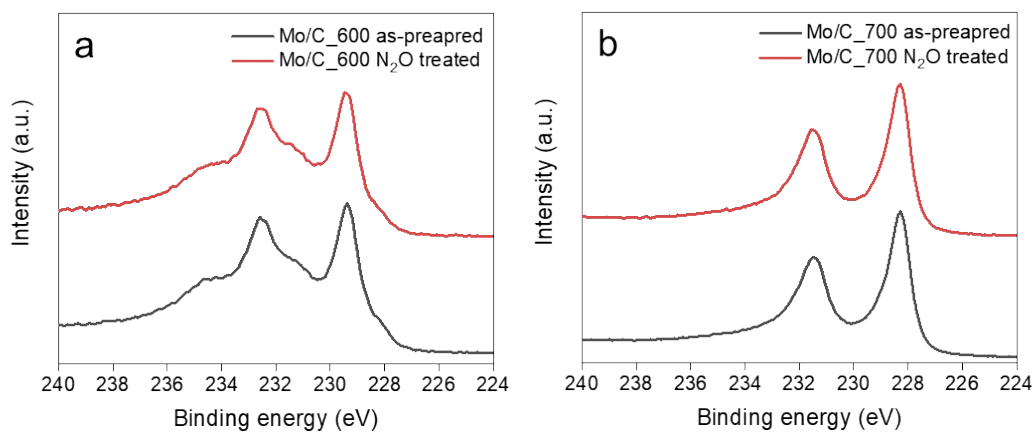

Figure S3. Quasi in situ XP spectra of as-prepared and  $N_2O$  treated (a) Mo/C(600) and (b) Mo/C(700) catalysts.

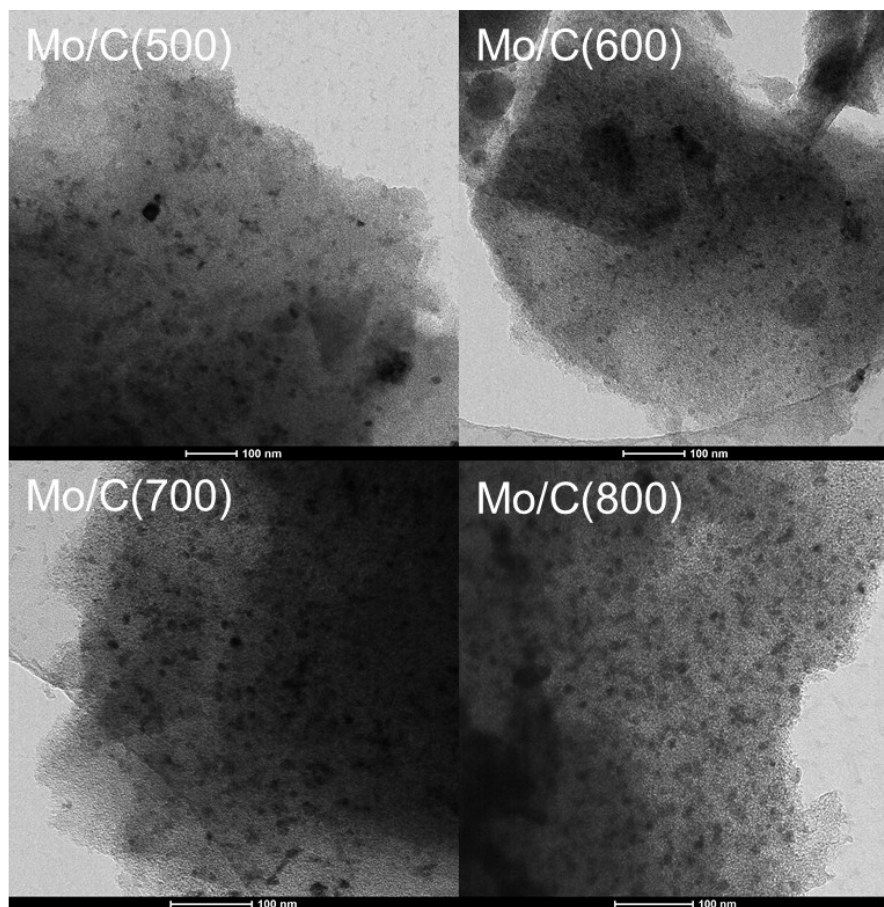

Figure S4. TEM images of as-prepared molybdenum (oxy)carbide catalysts.

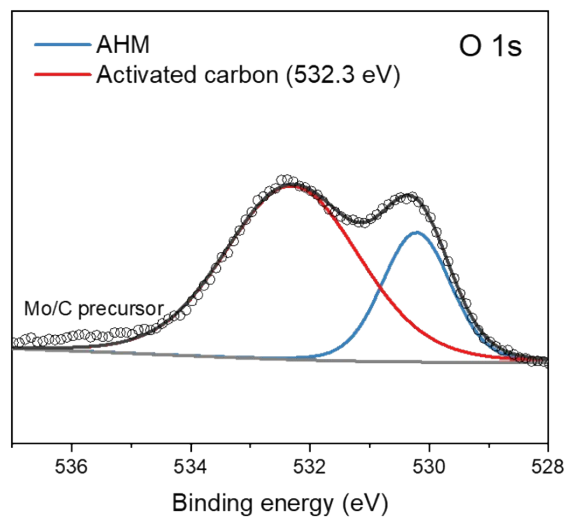

Figure S5. Mo 3d XP spectrum of Mo/C catalyst precursor.

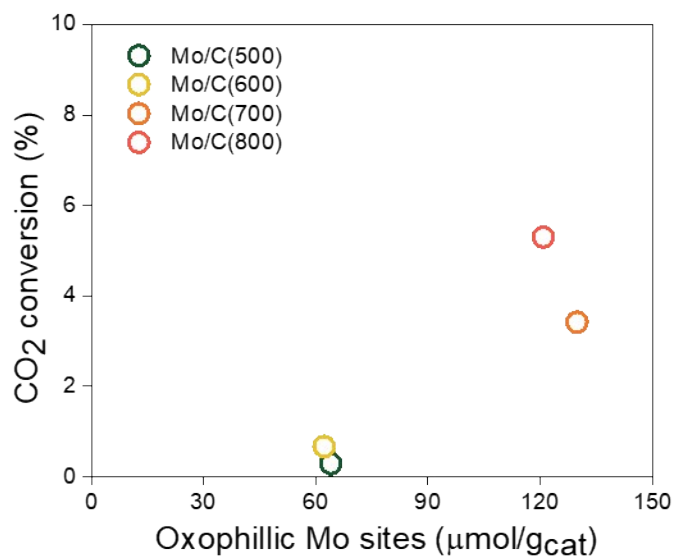

Figure S6. Correlation between CO<sub>2</sub> conversion and oxophilic Mo site density measured by N<sub>2</sub>O chemisorption.

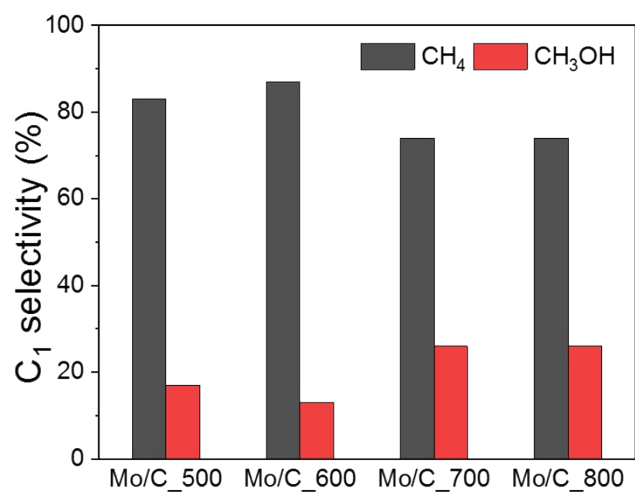

Figure S7. C<sub>1</sub> products selectivity over as-prepared (oxy)carbide catalysts during anisole HDO.

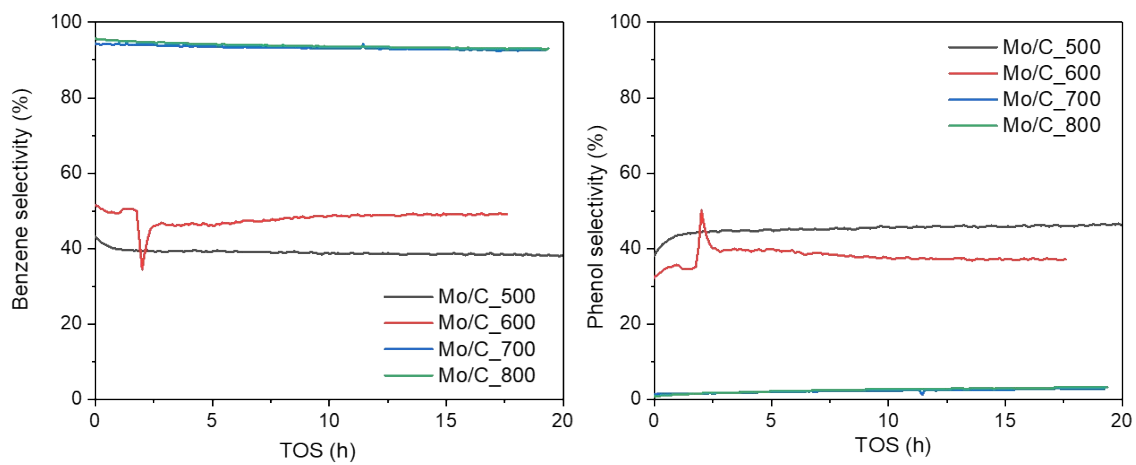

Figure S8. Time-on-stream benzene and phenol selectivity over the molybdenum (oxy)carbide catalysts.
